# Supplementary material for: A simple and reliable method for determining the delamination degree of nitrate and glycine intercalated LDHs in formamide
Source: Royal Society of Chemistry journal article supplement (doi:10.1039/c4cc05015k), 2014-07-14
Supplement: c4cc05015k1.pdf [file c4cc05015k1.pdf]

Supporting information

**A simple and reliable method for determining the delamination degree of nitrate and glycine intercalated LDHs in formamide**

Junya Wang,<sup>a</sup> Liang Huang,<sup>a</sup> Yanshan Gao,<sup>a</sup> Ruoyan Yang,<sup>a</sup> Zhang Zhang,<sup>a</sup> Zhanhu

Guo<sup>b</sup> and Qiang Wang<sup>\*,a</sup>

<sup>a</sup>College of Environmental Science and Engineering, Beijing Forestry University, 35 Qinghua East Road, Haidian District, Beijing 100083, China

<sup>b</sup>Integrated Composites Laboratory, Dan F Smith Department of Chemical Engineering, Lamar University, Beaumont, TX 77710, USA

\*Corresponding author:

Professor Qiang Wang,

College of Environmental Science and Engineering, Beijing Forestry University, 35 Qinghua East Road, Haidian District, Beijing 100083, P. R. China

E-mail: [qiang.wang.ox@gmail.com](mailto:qiang.wang.ox@gmail.com); [qiangwang@bjfu.edu.cn](mailto:qiangwang@bjfu.edu.cn)

Tel: +86 13699130626

## **1. Experimental section**

### **1.1 Synthesis of Mg<sub>3</sub>Al-NO<sub>3</sub> and Mg<sub>3</sub>Al-Gly LDHs**

A salt solution A (100 mL) containing a mixture of 0.075 mol Mg (NO<sub>3</sub>)<sub>2</sub>·6H<sub>2</sub>O and 0.025 mol Al(NO<sub>3</sub>)<sub>3</sub>·9H<sub>2</sub>O was added drop-wise into a basic solution B (100 mL) containing 0.05 mol Na<sub>2</sub>NO<sub>3</sub> (or glycine). The pH value of solution B was kept constant at 10 by the addition of a solution C (50 mL) containing 0.17 mol NaOH. The resulting mixture D was hydrothermally treated at 120 °C overnight. After hydrothermal aging, the sample was filtered and washed with deionized water until pH=7, then dried at 100 °C in an oven

### **1.2 Delamination of LDHs**

For the delamination of LDHs, various amounts of Mg-Al-NO<sub>3</sub> and Mg-Al-Gly LDHs were put into 20 mL formamide, followed by magnetic stirring till no sediment was observed upon standing.

### **1.3 Synthesis of nanospherical Mg<sub>3</sub>Al-CO<sub>3</sub> LDH suspension in water**

The nanospherical Mg<sub>3</sub>Al-CO<sub>3</sub> LDH suspension in water was synthesized using a modified coprecipitation method. A salt solution A (100 mL) containing a mixture of 0.0075 mol Mg (NO<sub>3</sub>)<sub>2</sub>·6H<sub>2</sub>O and 0.0025 mol Al(NO<sub>3</sub>)<sub>3</sub>·9H<sub>2</sub>O was added drop-wise to a basic solution B (100 mL) containing 0.05 mol Na<sub>2</sub>CO<sub>3</sub>. The pH of the precipitation solution was kept constant at 12 by adding NaOH solution (3.4 M) drop-wise. The resulting mixture D was aging overnight at room temperature. Then it was filtered by medium speed filter paper, by which a stable LDH suspension in water was obtained.

### **1.4 Characterization of samples**

XRD patterns were recorded on a Shimadzu XRD-6000 instrument in reflection mode with Cu Ka radiation. The accelerating voltage was set at 40 kV with 30 mA current

( $\lambda = 1.542\text{\AA}$ ) at  $0.1^\circ \text{ s}^{-1}$  from  $5$  to  $65^\circ$ .

The morphologies of samples were characterized by field emission scanning electron microscope (FESEM, SU-8020). High resolution transmission electron microscopy (HR-TEM) images were obtained on a JEOL 2010, operating at 200 kV. The turbidity of the delaminated LDHs dispersions in formamide was measured using a turbidimeter (TN-100, Eutech Instruments, Singapore).

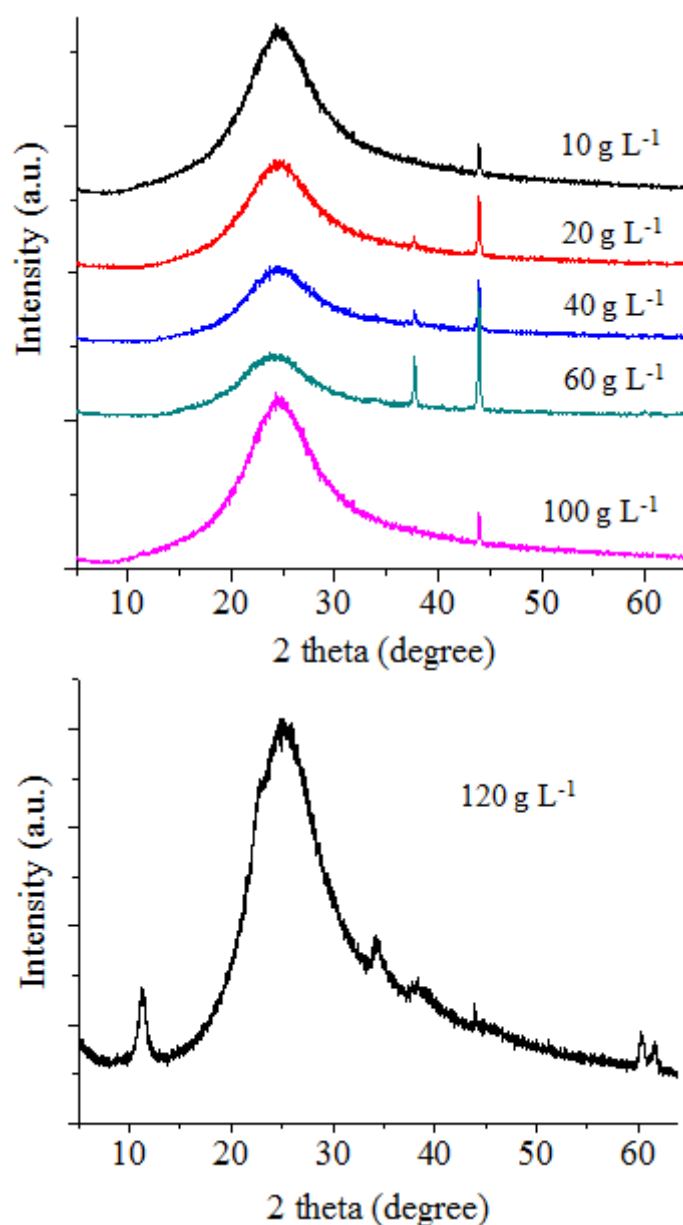

**Figure S1.** XRD diffraction patterns of delaminated Mg-Al-GLy LDH dispersion gels.
